# Supplementary material for: Absorption instruments inter-comparison campaign at the Arctic Pallas station
Source: Copernicus journal article supplement (doi:10.5194/amt-14-5397-2021), 2021-08-06
Supplement: Supplementary file 1 [file amt-14-5397-2021-supplement.pdf]

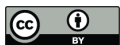

*Supplement of*

## **Absorption instruments inter-comparison campaign at the Arctic Pallas station**

**Eija Asmi et al.**

*Correspondence to:* Eija Asmi (eija.asmi@fmi.fi)

The copyright of individual parts of the supplement might differ from the article licence.

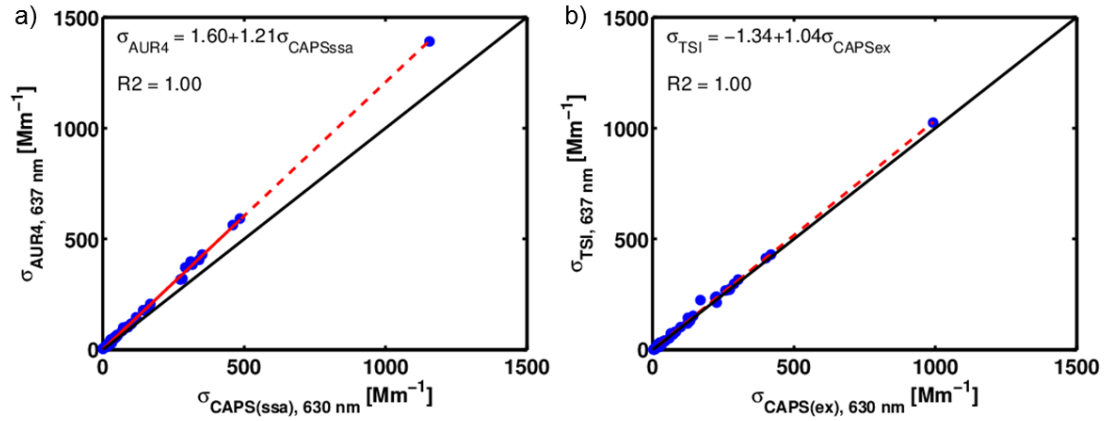

Figure S1. Scattering of pure ammonium sulphate particles measured by nephelometers and CAPS instruments in the three calibrations performed during the campaign. Data are averaged to 5-min. In y-axis the aerosol scattering measured by a) the Aurora 4000 nephelometer at  $\lambda=635$  nm and b) the TSI nephelometer interpolated to a  $\lambda=635$  nm and in x-axis the extinction measured by a) the CAPSssa at  $\lambda=630$  nm and b) the CAPSex  $\lambda=630$  nm. The obtained slope ( $a = 1.21$  and  $b=1.04$ ) was used to determine the CAPS instrument specific loss-correction factor.
